# Supplementary material
Source: ML conference proceedings conference paper supplement (https://proceedings.neurips.cc/paper_files/paper/2016/hash/53ed35c74a2ec275b837374f04396c03-Abstract.html)
Supplement: Supplementary file [file 53ed35c74a2ec275b837374f04396c03-Supplemental.zip]

---

**Algorithm 1** COEVOLUTIONARY LATENT FEATURE PROCESSES
 

---

```

1: Input: Events  $\mathcal{T}$ , learning rate  $\xi$ . Output:  $\eta, \mathbf{X}$ 
2: Choose to initialize  $\eta^0, \mathbf{X}^0, \mathbf{Z}_1^0, \mathbf{Z}_2^0$ 
3: for  $k = 1$  to  $MaxIter$  do
4:   Compute  $\mathbf{X}^k = (\mathbf{X}^{k-1} - \xi \nabla_{\mathbf{X}} f(\mathbf{X}^{k-1}, \eta^{k-1}, \mathbf{Z}_1^{k-1}, \mathbf{Z}_2^{k-1}))_+$ 
5:   Compute  $\eta^k = (\eta^{k-1} - \xi \nabla_{\eta} f(\mathbf{X}^{k-1}, \eta^{k-1}, \mathbf{Z}_1^{k-1}, \mathbf{Z}_2^{k-1}))_+$ 
6:   Find  $(\mathbf{u}_1, \mathbf{v}_1)$  as top singular vector pairs of  $-\nabla_{\mathbf{Z}_1} f(\mathbf{X}^k, \eta^k, \mathbf{Z}_1^{k-1}, \mathbf{Z}_2^{k-1})$ 
7:   Find  $(\mathbf{u}_2, \mathbf{v}_2)$  as top singular vector pairs of  $-\nabla_{\mathbf{Z}_2} f(\mathbf{X}^k, \eta^k, \mathbf{Z}_1^{k-1}, \mathbf{Z}_2^{k-1})$ 
8:   Set  $\delta_k = \frac{2}{k+1}$  and find  $\theta_k^i$  by solving  $\theta_k^i = \operatorname{argmin}_{\theta \geq 0} h^i(\theta_k^i)$  for  $i \in \{1, 2\}$ .
9:    $\mathbf{Z}_1^k = (1 - \delta_k) \mathbf{Z}_1^{k-1} + \delta_k \theta_k^1 \mathbf{u}_1 \mathbf{v}_1^\top$ ,  $\mathbf{Z}_2^k = (1 - \delta_k) \mathbf{Z}_2^{k-1} + \delta_k \theta_k^2 \mathbf{u}_2 \mathbf{v}_2^\top$ 
10: end for

```

---

## A Generalized Conditional Gradient Algorithm

In this section, we provide details on the latest generalized conditional gradient descent algorithm proposed in [9]. We first provide an alternative formulation of the objective function, and then present the general algorithm.

### A.1 Alternative Formulation

Directly solving the objective (7) is difficult since the nonnegative constraints are entangled with the non-smooth nuclear norm penalty. To address this challenge, we use a simple penalty method. Specifically, given  $\rho > 0$ , we arrive at the next formulation (8) by introducing two auxiliary variables  $\mathbf{Z}_1$  and  $\mathbf{Z}_2$  with some penalty function, such as the squared Frobenius norm.

$$\min_{\eta \geq 0, \mathbf{X} \geq 0, \mathbf{Z}_1, \mathbf{Z}_2} \ell(\eta, \mathbf{X}) + \gamma \|\mathbf{X} - \mathbf{X}^\top\|_F^2 + \alpha \|\mathbf{Z}_1\|_* + \beta \|\mathbf{Z}_2\|_* + \rho \|\eta - \mathbf{Z}_1\|_F^2 + \rho \|\mathbf{X} - \mathbf{Z}_2\|_F^2 \quad (8)$$

The new formulation (8) allows us to handle the non-negativity constraints and nuclear norm regularization terms separately.

### A.2 Alternating Updates between Proximal Gradient and Conditional Gradient

Now, we present Algorithm 1 that can solve (8) efficiently. For notation simplicity, we first set

$$f(\eta, \mathbf{X}, \mathbf{Z}_1, \mathbf{Z}_2) = \ell(\eta, \mathbf{X}) + \gamma \|\mathbf{X} - \mathbf{X}^\top\|_F^2 + \rho \|\eta - \mathbf{Z}_1\|_F^2 + \rho \|\mathbf{X} - \mathbf{Z}_2\|_F^2$$

At each iteration, we apply cheap projection gradient for block  $\{\eta, \mathbf{X}\}$  and cheap linear minimization for block  $\{\mathbf{Z}_1, \mathbf{Z}_2\}$ . Specifically, the algorithm consists of two main alternating subroutines:

**Proximal Gradient.** When updating  $\{\eta, \mathbf{X}\}$ , we directly compute the associated proximal operator, which in our case, reduces to the simple projection as follows,

$$\begin{aligned} \mathbf{X}^k &= (\mathbf{X}^{k-1} - \xi \nabla_{\mathbf{X}} f(\mathbf{X}^{k-1}, \eta^{k-1}, \mathbf{Z}_1^{k-1}, \mathbf{Z}_2^{k-1}))_+ \\ \eta^k &= (\eta^{k-1} - \xi \nabla_{\eta} f(\mathbf{X}^{k-1}, \eta^{k-1}, \mathbf{Z}_1^{k-1}, \mathbf{Z}_2^{k-1}))_+ \end{aligned}$$

where  $(\cdot)_+$  simply sets the negative coordinates to zero.

**Conditional Gradient.** When updating  $\{\mathbf{Z}_1, \mathbf{Z}_2\}$ , we use the conditional gradient algorithm that successively linearizes  $f$  and finds a descent direction by solving:

$$\mathbf{Y}_1^k = \operatorname{argmin}_{\|\mathbf{Y}\|_* \leq 1} \left\langle \mathbf{Y}, \nabla_{\mathbf{Z}_1} f(\mathbf{X}^k, \eta^k, \mathbf{Z}_1^{k-1}, \mathbf{Z}_2^{k-1}) \right\rangle \quad (9)$$

and then takes the convex combination  $\mathbf{Z}_1^k = (1 - \delta_k) \mathbf{Z}_1^{k-1} + \delta_k \theta_k \mathbf{Y}_1^k$  with a suitable step size  $\eta_k$  and scaling factor  $\theta_k$ . The minimizer of (9) is the outer product of the top singular vector pair of  $-\nabla_{\mathbf{Z}_1} f(\mathbf{X}^k, \eta^k, \mathbf{Z}_1^{k-1}, \mathbf{Z}_2^{k-1})$ , which can be computed efficiently in linear time using Lanczos algorithm [8]. Next we perform a line search to find  $\theta_k = \operatorname{argmin}_{\theta \geq 0} h^1(\theta_k)$ , where  $h^1(\theta_k) = f(\mathbf{Z}_1^k) + \alpha \delta_k \theta_k$ . Here  $h^1(\theta_k)$  is the upper bound of the objective function at  $\mathbf{Z}_1^k$ , and one can compute  $\theta_k$  efficiently in close form. Similarly, one can repeat the same procedure for computing  $\mathbf{Z}_2^k$ , and we use  $h^2(\theta_k)$  to denote the linear search function for  $\mathbf{Z}_2^k$ .
